# Supplementary material for: A polyhedral oligomeric silsesquioxane-based catalyst for the efficient synthesis of cyclic carbonates
Source: Royal Society of Chemistry journal article supplement (doi:10.1039/c5cy00830a), 2015-01-01

## SUPPORTING INFORMATION

# Polyhedral Oligomeric Silsesquioxane Based Catalyst for the Efficient Synthesis of Cyclic Carbonates

*Lucia Anna Bivona,<sup>1,2</sup> Ornella Fichera,<sup>1</sup> Luca Fusaro<sup>1</sup>, Francesco Giacalone,<sup>2</sup> Mireia Buaki-Sogo,<sup>1,\*</sup> Michelangelo Gruttadauria,<sup>2,\*</sup> Carmela Aprile.<sup>1,\*</sup>*



## **Contents:**

Figure S1:  $^1\text{H}$  NMR spectrum of **POSS-Cl**

Figure S2:  $^{13}\text{C}$  NMR spectrum of **POSS-Cl**

Figure S3: IR spectrum of **POSS-Cl**

Figure S4:  $^1\text{H}$  NMR spectrum of **POSS-Imi**

Figure S5:  $^{13}\text{C}$  NMR spectrum of **POSS-Imi**

Figure S6: IR spectrum of **POSS-Imi**

Figure S7:  $^1\text{H}$  NMR spectrum of **POSS-Me**

Figure S8:  $^{13}\text{C}$  NMR spectrum of **POSS-Me**

Figure S9: IR spectrum of **POSS-Me**

Figure S10:  $^{29}\text{Si}$  NMR spectrum of **POSS-Cl**

Figure S11:  $^{29}\text{Si}$  NMR spectrum of **POSS-Me**

Figure S12:  $^1\text{H}$  NMR spectrum of **styrene glycol**

Figure S13:  $^{13}\text{C}$  NMR spectrum of **styrene glycol**



**Figure S1:**  $^1\text{H}$  NMR of POSS-Cl

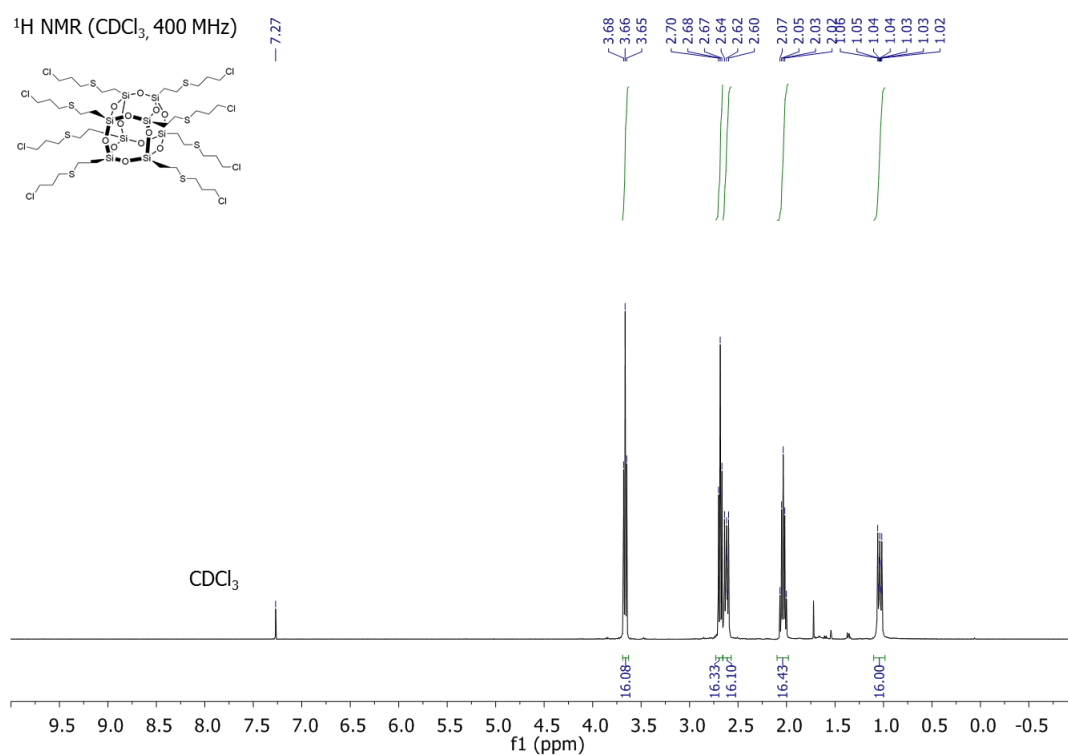

**Figure S2:**  $^{13}\text{C}$  NMR of POSS-Cl

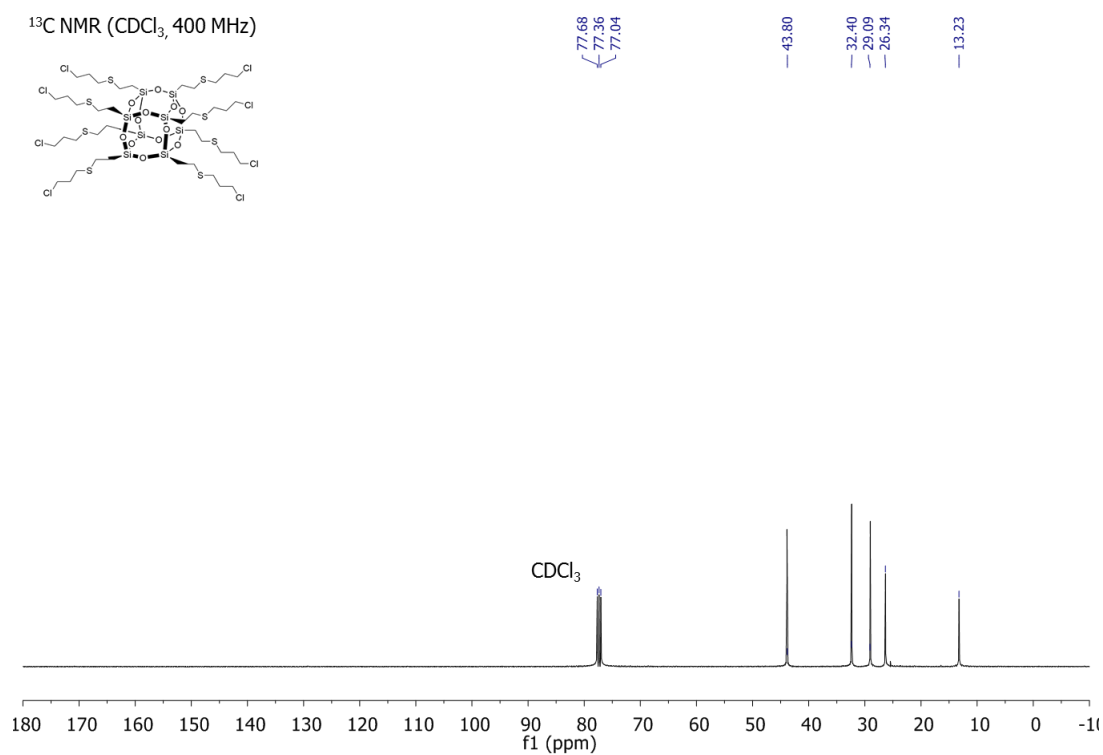



**Figure S3:** IR spectrum of POSS-Cl

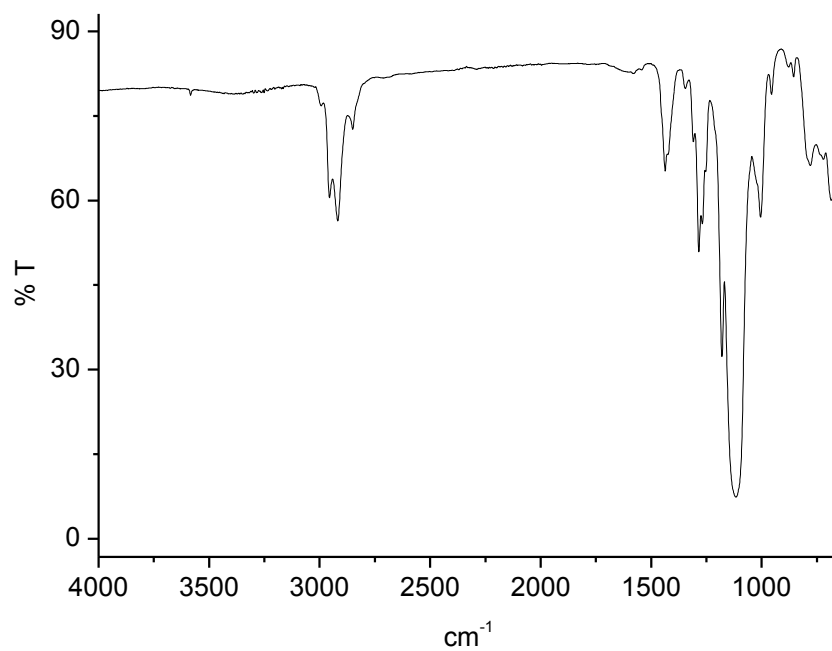

**Figure S4:**  $^1\text{H}$  NMR of POSS-Imi

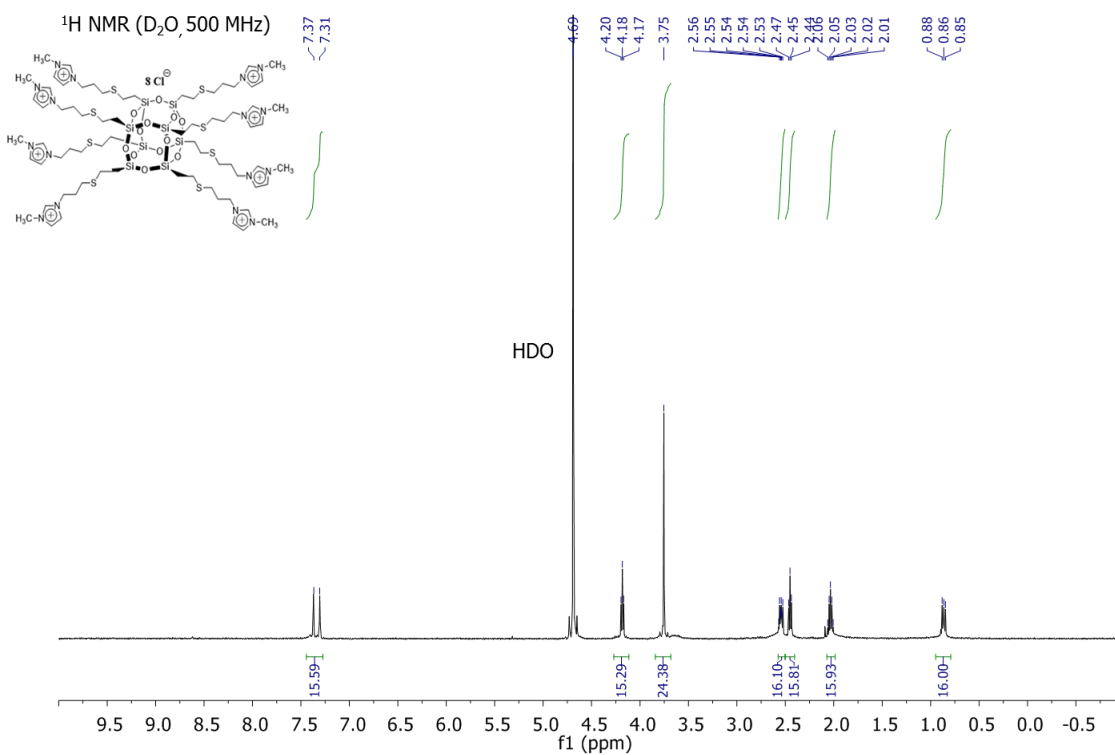



**Figure S5:**  $^{13}\text{C}$  NMR of POSS-Imi

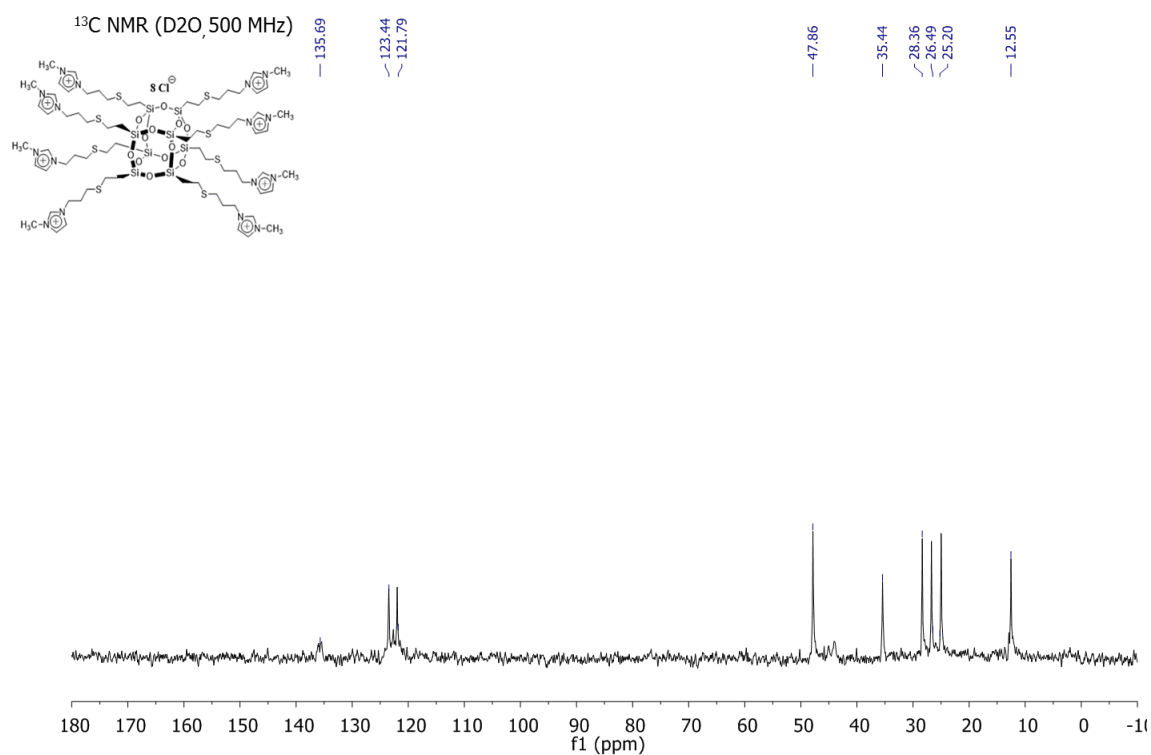

**Figure S6:** IR spectrum of POSS-Imi

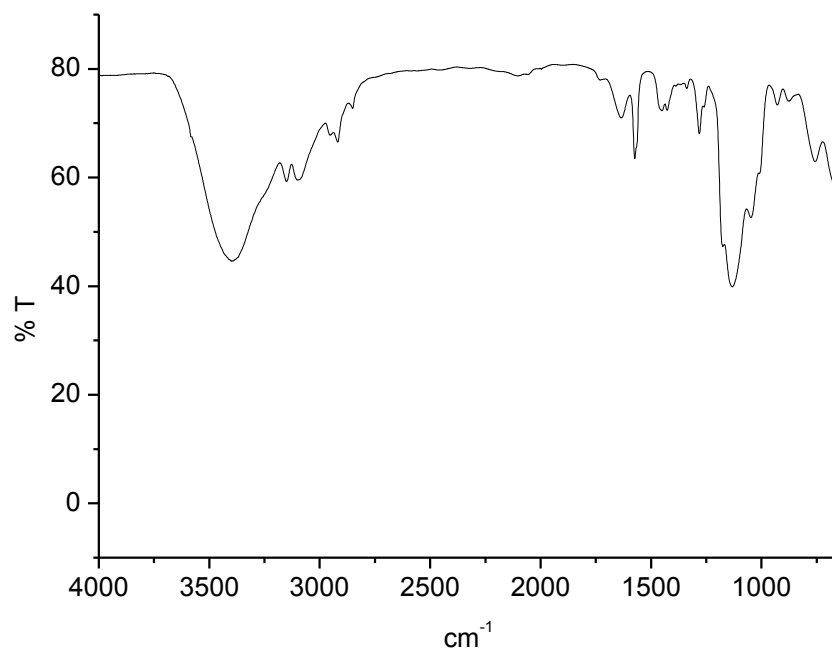



**Figure S7:**  $^1\text{H}$  NMR of POSS-Me

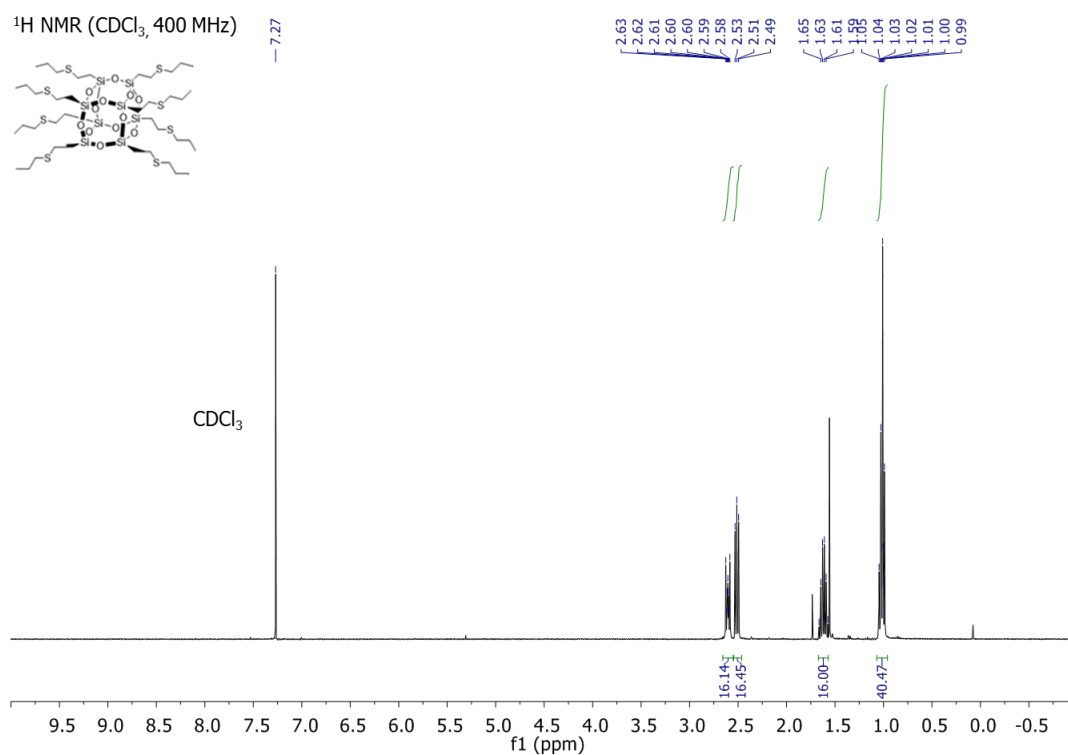

**Figure S8:**  $^{13}\text{C}$  NMR of POSS-Me

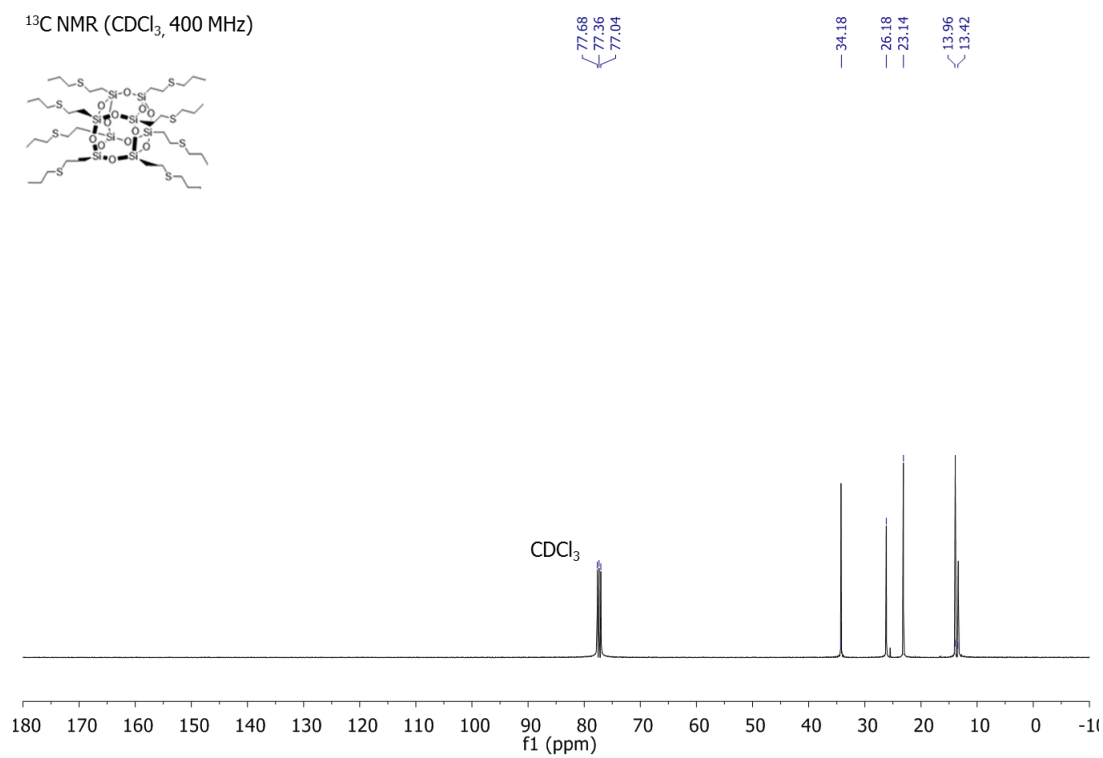



**Figure S9:** IR spectrum of POSS-Me

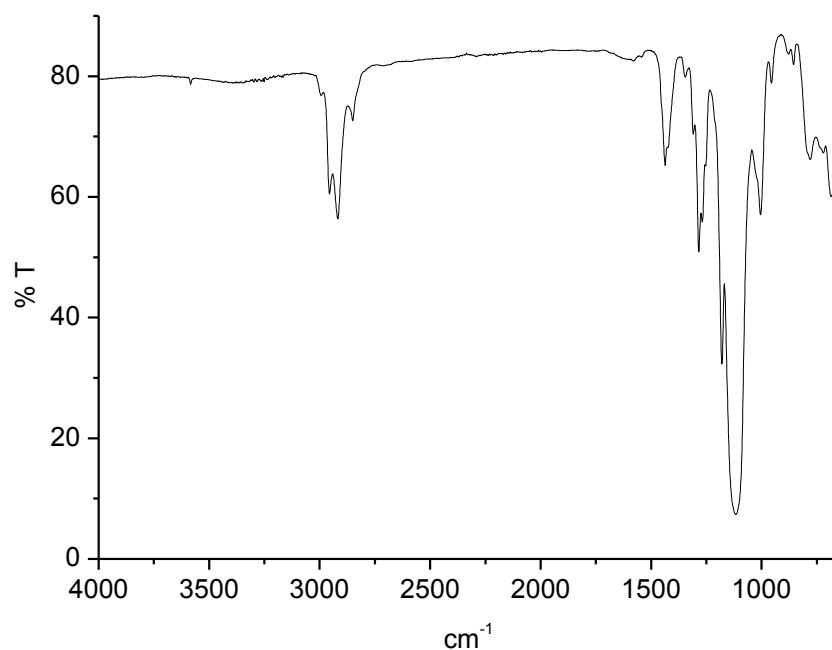

**Figure S10:** <sup>29</sup>Si NMR of POSS-Cl in tol-d<sub>8</sub> (a), <sup>29</sup>Si NMR of POSS-Cl in tol-d<sub>8</sub> after 16h at 90°C (b), <sup>29</sup>Si NMR of POSS-Cl in tol-d<sub>8</sub> after 48h at 90°C with 10 μL of H<sub>2</sub>O (c).

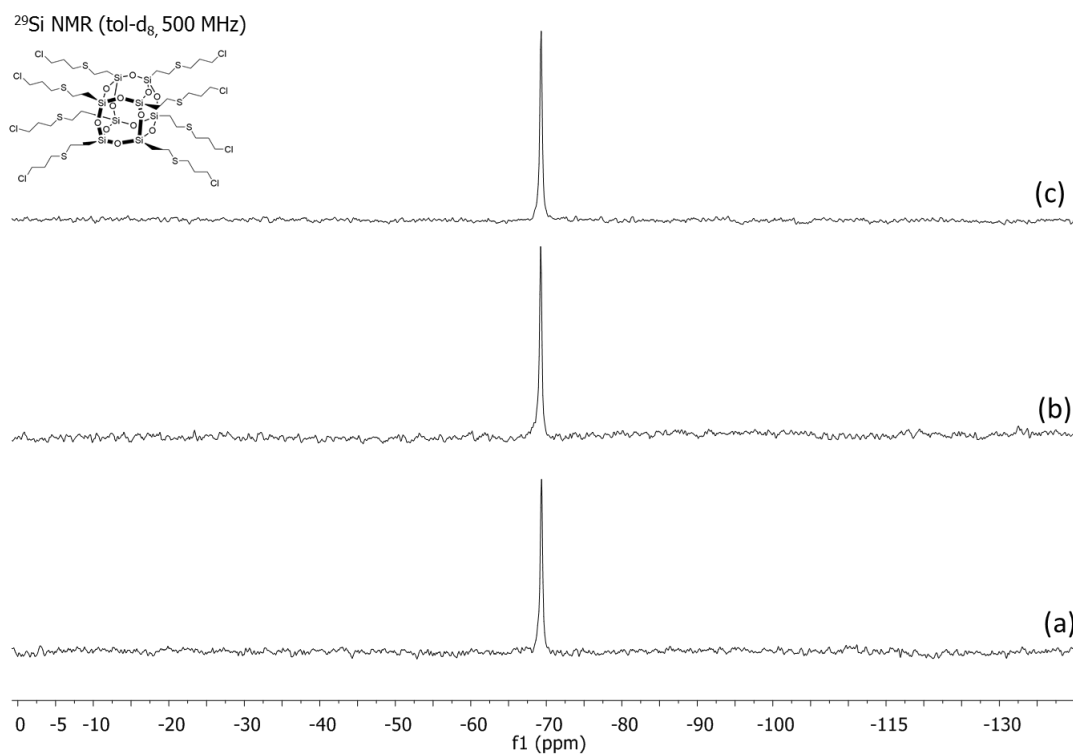



**Figure S11:**  $^{29}\text{Si}$  NMR of POSS-Me in tol- $d_8$  (a),  $^{29}\text{Si}$  NMR of POSS-Me in tol- $d_8$  after 48h at 90°C with 1-MeImi (24 eq.) (b),  $^{29}\text{Si}$  NMR of POSS-Me in tol- $d_8$  after 48h at 90°C with bmim-Cl (8 eq.) (c).

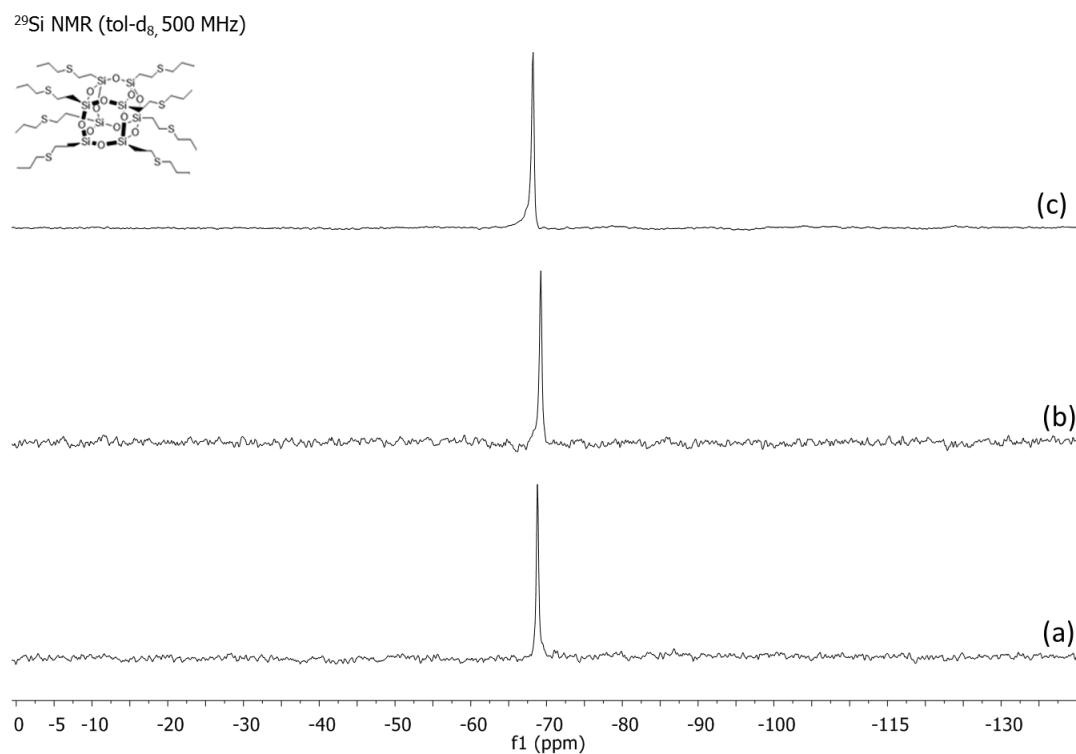

**Figure S12:**  $^1\text{H}$  NMR of styrene glycol

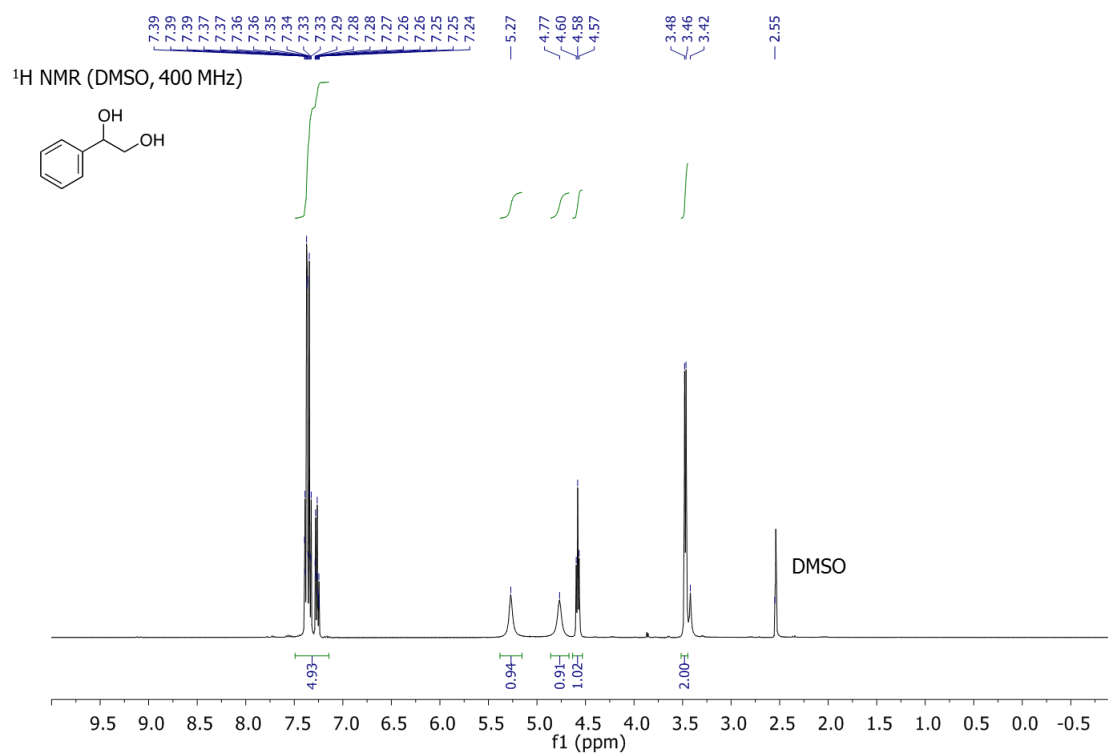



**Figure S13:**  $^{13}\text{C}$  NMR of styrene glycol

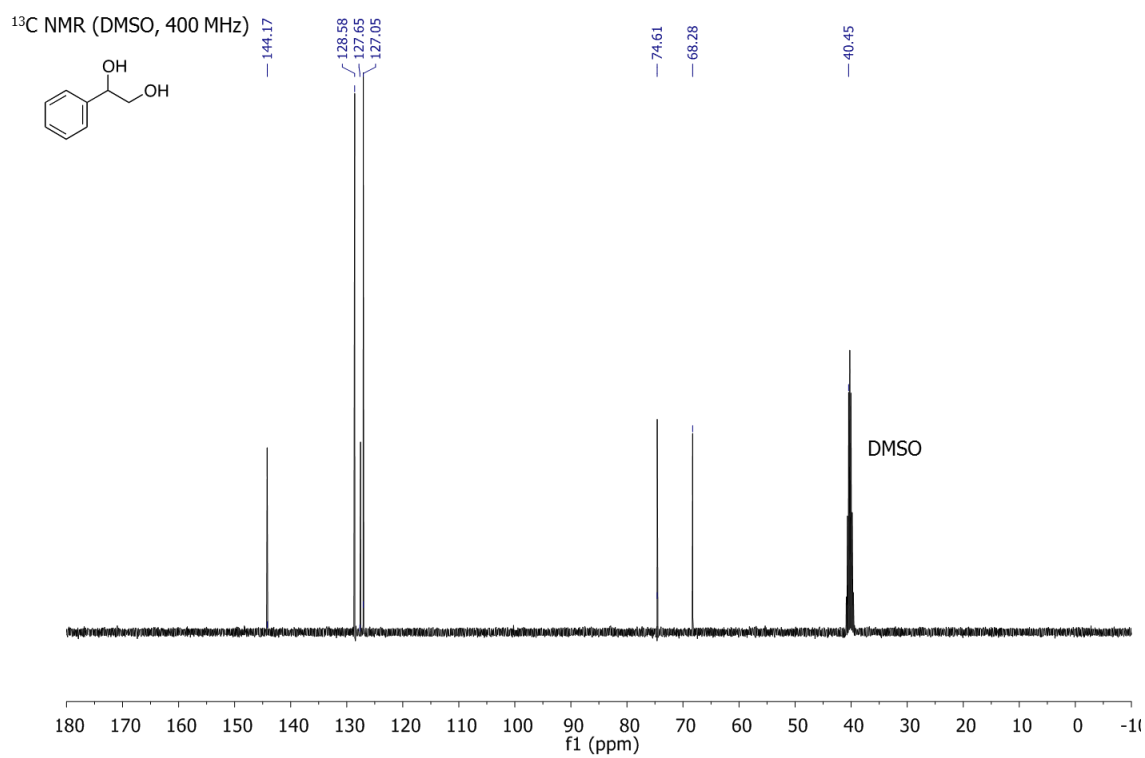

Supplement: c5cy00830a1.pdf [file c5cy00830a1.pdf]
